# Supplementary material for: GiniClust: detecting rare cell types from single-cell gene expression data with Gini index
Source: PubMed Central journal article supplement (PMC4930624; doi:10.1186/s13059-016-1010-4), 2016-07-01

Supplemental Figure 3

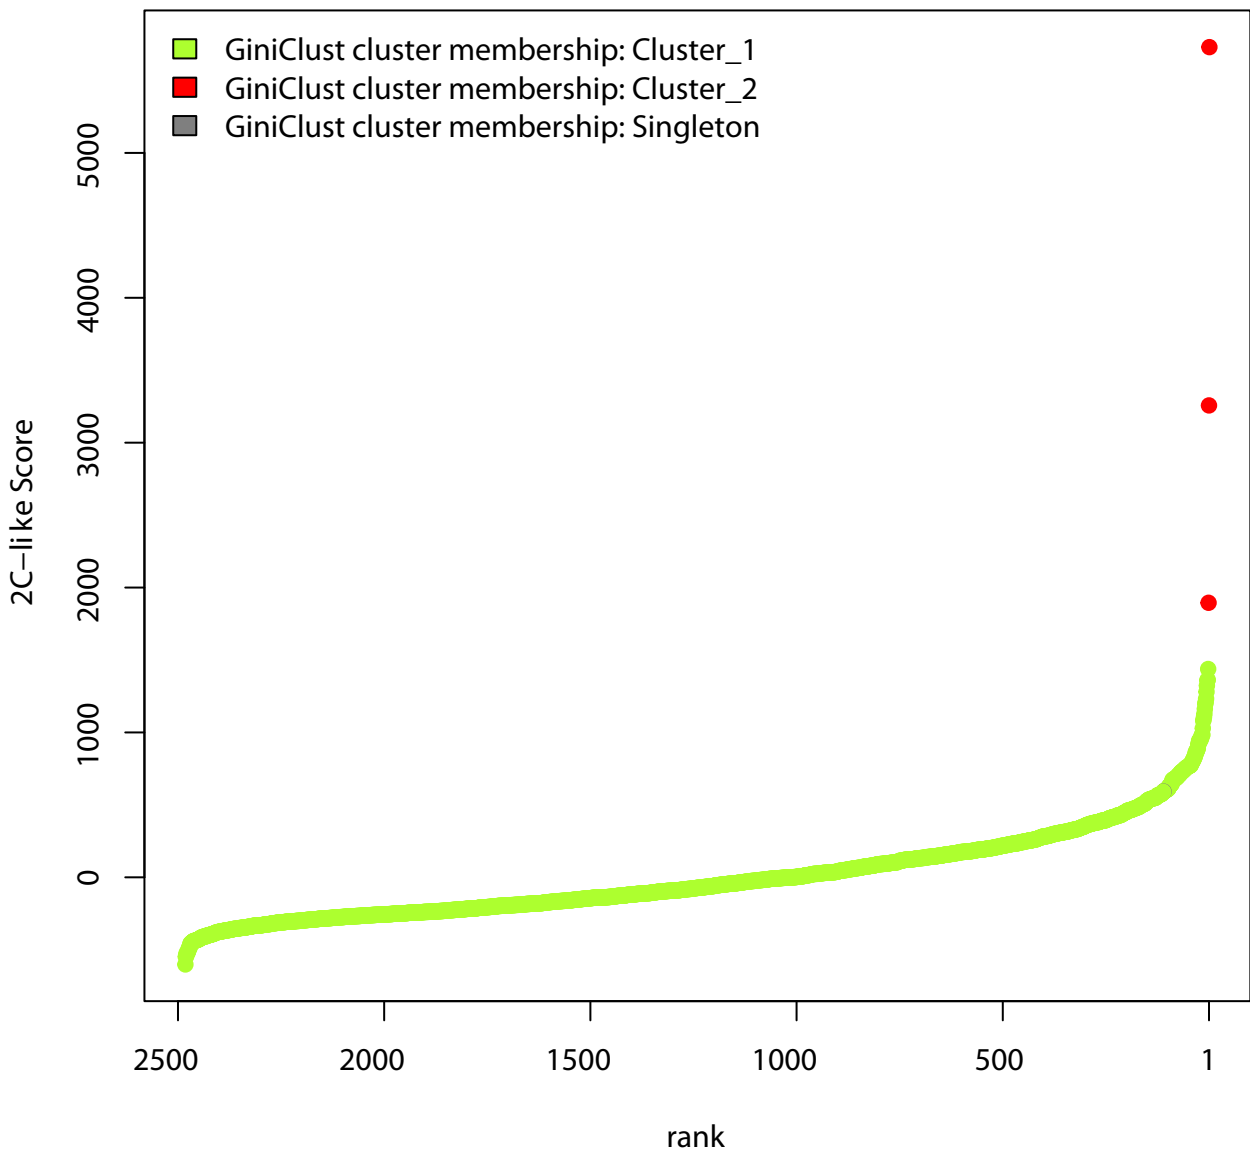

Supplement: 13059_2016_1010_MOESM9_ESM.pdf [file 13059_2016_1010_MOESM9_ESM.pdf]
